# Supplementary material for: Micro-mechanics of electrostatically stabilized suspensions of cellulose nanofibrils under steady state shear flow
Source: Royal Society of Chemistry journal article supplement (doi:10.1039/c5sm02310f), 2015-12-18
Supplement: c5sm02310f1.pdf [file c5sm02310f1.pdf]

## Supplementary Materials

# Micro-mechanics of electrostatically stabilized suspensions of cellulose nanofibrils under steady state shear flow

*F. Martoia*<sup>1,2,3,4,5</sup>, *P.J.J. Dumont*<sup>1,2,3\*,\*\*</sup>, *L. Orgéas*<sup>4,5</sup>, *M.N. Belgacem*<sup>1,2,3</sup>, *J.-L. Putaux*<sup>6,7</sup>

<sup>1</sup>Univ. Grenoble Alpes, LGP2, F-38000 Grenoble, France

<sup>2</sup>CNRS, LGP2, F-38000 Grenoble, France

<sup>3</sup>Agefpi, F-38000 Grenoble, France

<sup>4</sup>Univ. Grenoble Alpes, 3SR, F-38000 Grenoble, France

<sup>5</sup>CNRS, 3SR, F-38000 Grenoble, France

<sup>6</sup>Univ. Grenoble Alpes, CERMAV, F-38000 Grenoble; France

<sup>7</sup>CNRS, CERMAV, F-38000 Grenoble, France

\*Corresponding author's email: [pierre.dumont@insa-lyon.fr](mailto:pierre.dumont@insa-lyon.fr)

\*\*Present address: Université de Lyon, INSA-Lyon, LaMCoS CNRS UMR5259, F-69621  
Villeurbanne cedex, France

### Appendix S1

For a prolate ellipsoid with an aspect ratio  $r' = a/b$  (where  $a$  and  $b$  are the major and minor axes of the prolate ellipsoid, respectively), the shape factor writes  $\lambda = (r'^2 - 1)/(r'^2 + 1)$ <sup>1</sup>. For more complicated particles such as the studied NFCs, the estimate of  $\lambda$  is not straightforward<sup>2</sup>. For simplicity sake, as shown in Fig. 8, a first order estimation of  $\lambda$  was used. Hence, the

coefficient  $\lambda$  was calculated from the prolate ellipsoid that displays the same inertia axes and moments as NFC  $i$ .

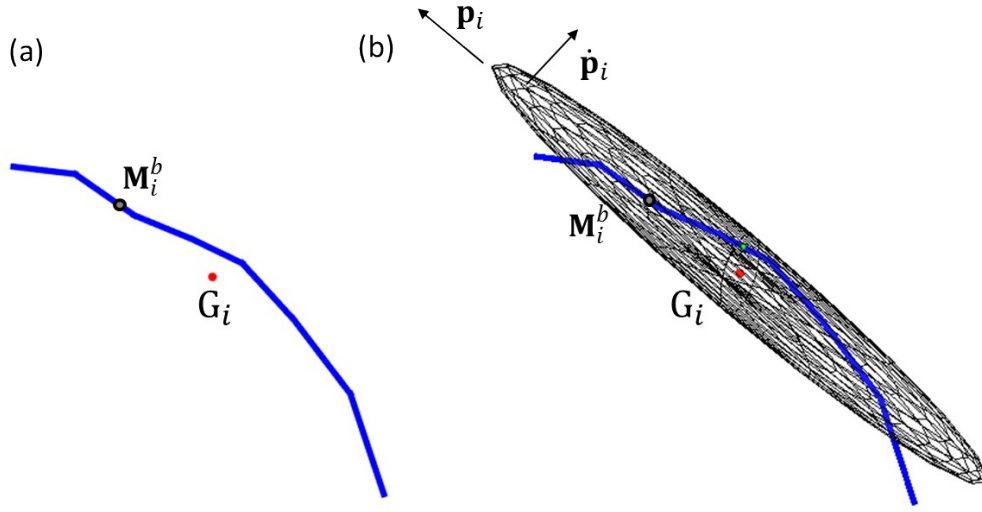

**Figure 8.** Sketch that shows (a) the NFC  $i$  and (b) its associated equivalent prolate ellipsoid with the same inertia axes and moments.

## Appendix S2

Each tortuous nanofiber  $i$  of diameter  $d$  and length  $l$  contained  $n_{seg}$  straight segments of length  $l_{seg}$  that had a random relative misorientation  $\theta_{seg}$ . Their center of mass  $G_i$  was randomly placed in the elementary volume  $\Omega$ . Following this procedure, various fibrous networks with various nanofiber contents  $\phi$  were generated with random orientation of nanofibers, *i.e.*, the generated microstructures exhibited isotropic fiber orientation with second order orientation

tensors  $A = \frac{1}{3}e_i \otimes e_i$  (Fig. 5a and Fig. 5c for the corresponding pole figure of orientation). This type of microstructures was chosen because it constituted a reference state, potentially close to that of NFC suspensions at rest (where Brownian motion presumably induces particle dispersion<sup>3,4</sup>).

To mimic microstructures with a pronounced NFC orientation along the flow direction<sup>3</sup> under shear flow, *i.e.*, for  $\nabla v = \dot{\gamma} e_1 \otimes e_2$ , the evolution of the mean orientation vector  $p_i$  of each NFC  $i$  was computed up to the steady state overall orientation of the fibrous networks, solving the Jeffery-based model (eqn (17)) with  $D_r = C_I \sqrt{2D:\overline{D}}$  and  $C_I = 10^{-3}$ <sup>5,6</sup>. For convenience, calculations were done using the expansion in spheric harmonics up to the fourth order<sup>7</sup> of the orientation distribution . Hence, the following approximation was used<sup>8</sup>:

$$\frac{1}{\psi} \frac{\partial \psi(p)}{\partial p} \approx 4 \frac{-21A \cdot p + 63p \cdot A : p \otimes p}{3 - 42A : p \otimes p + 63p \otimes p : A : p \otimes p}, \quad (22)$$

All the simulations were run using Matlab and a suitable time step  $\Delta t = \Delta\gamma/\dot{\gamma}$  such that  $\Delta\gamma = 0.01$  until reaching a steady state, which was close to a shear strain  $\gamma = 100$ . Then, the simulation procedure led to orientated fibrous microstructures with  $A \approx 0.9e_1 \otimes e_1 + 0.05(e_2 \otimes e_2 + e_3 \otimes e_3)$  (Fig. 5b and Fig. 5d for the corresponding pole figures of orientation). In accordance with the Jeffery-based models, it is worth to note that the resulting fiber orientation only depended on initial orientation state and on the applied shear strain, but not on the shear rate  $\dot{\gamma}$ .

## References

- 1 G. B. Jeffery, Proc. R. Soc. Lond. Math. Phys. Eng. Sci., 1922, 102, 161–179.
- 2 F. P. Bretherton, J. Fluid Mech., 1962, 14, 284–304.
- 3 K. M. O. Håkansson, A. B. Fall, F. Lundell, S. Yu, C. Krywka, S. V. Roth, G. Santoro, M. Kvik, L. Prahl Wittberg, L. Wågberg and L. D. Söderberg, Nat. Commun., 2014, 5:4018.
- 4 R. G. L. Larson, The Structure and Rheology of Complex Fluids, Oxford University Press, New York, 1 edition., 1998.
- 5 F. Folgar and C. L. Tucker, J. Reinf. Plast. Compos., 1984, 3, 98–119.
- 6 S. G. Advani, Flow and Rheology in Polymer Composites Manufacturing, Elsevier, 1994.

- 7 S. G. Advani and C. L. Tucker. II, *J. Rheol.*, 1987, 31, 751–784.
- 8 M. Djalili-Moghaddam and S. Toll, *J. Non-Newton. Fluid Mech.*, 2005, 132, 73–83.
